# Supplementary material
Source: PubMed Central journal article supplement (PMC6735421)

1 **STUDY PROTOCOL**

2 **Study title:**

3 The effect of immersive virtual reality education before pediatric radiography on anxiety and distress of patients:

4 A randomized controlled trial

5

6 **Principal Investigator:**

7 Jung-Hee Ryu, MD, PhD

8 Department of Anaesthesiology and Pain Medicine,

9 Medical Virtual Reality Research Group,

10 Seoul National University Bundang Hospital,

11 (e-mail: [jinaryu74@gmail.com](mailto:jinaryu74@gmail.com))

12

13 **Co-investigators:**

14 Sung-Hee Han, MD, PhD; Jin-Woo Park, MD, PhD; Sang Il Choi, MD, Ph; Ji Young Kim, MD, PhD; Hyunju

15 Lee, MD, PhD; Hee-Jeong Yoo, MD, PhD

16

17 **I. Summary**

18 Pediatric patients often encounter anxiety and distress in hospital settings and the virtual reality (VR)  
19 that provides a vivid, immersive and realistic experience has been introduced as a method of pediatric patient  
20 education. This prospective, randomized, and clinical trial is designed to evaluate whether the VR education of  
21 the pediatric patients before the chest radiography could reduce anxiety and distress in children and could  
22 improve the radiographic process.

23 One hundred children scheduled for chest radiography will be randomly divided into either the control  
24 (n = 50) or VR group (n = 50). Children in the control group enter the radiography room with usual simple  
25 instruction for chest radiography, whereas those in the VR group receive a 3-min VR experiencing regarding the  
26 process of chest radiography. Anxiety and distress of pediatric patient will be evaluated with behavioral  
27 observation using the amended version of Observational Scale of Behavioral Distress (OSBD) scale for  
28 radiology procedures. Need of parental presence, parental satisfaction score, procedure time, number of re-take,  
29 and process difficulty score will be also recorded.

30 **II. Purpose**

31 To evaluate the effect of VR education of chest radiography on anxiety of pediatric patients and on the  
32 efficiency of radiologic procedure.

33 Hypothesis #1: VR education about radiologic process before the radiography may reduce anxiety and  
34 distress in pediatric patients.

35 Hypothesis #2-a: VR education may reduce need of parental presence to properly perform chest radiography.

36 Hypothesis #2-b: VR education may reduce procedure time

37 Hypothesis #2-c: VR education may reduce the difficulty of taking adequate X-ray.

38 Hypothesis #2-d: VR education may reduce the incidence of re-take

39 Hypothesis #2-e: VR education may increase parental satisfaction score.

40

41 **III. Background**

42 Pediatric patients often experience fear and anxiety in unfamiliar hospital setting and procedures. In  
43 radiology settings, unfamiliar radiology room and large radiology machines make pediatric patients feel anxiety  
44 and distress. Distress of pediatric patients in radiology setting may lead to stress behaviors such as crying,  
45 moving and flailing, which result in delay or cancellation of the process of radiology. The stressful nature of  
46 radiology procedures for pediatric patients also may result in long-term effects such as post-traumatic stress  
47 syndrome or avoidance of healthcare.

48 Several methods including sedation and distraction have been tried to reduce pediatric patient stress  
49 level in pediatric radiology department. Sedation of pediatric patient increased the process time and needed  
50 recovery time after procedure. Moreover, sedation administration increased the risk of cardiovascular and  
51 respiratory complication such as desaturation. Positive environment distractions such as physical environment  
52 distractions including artworks and gardens were provided in pediatric radiology settings and these interventions  
53 reduced stress and improved outcome in pediatric patient with radiology examinations.

54 Recently, virtual reality (VR) systems have been introduced in patient education to reduce anxiety and  
55 to improve outcome with the advance of technology. Previous investigations with VR experience or  
56 gamification about preoperative process demonstrated significant reduction of preoperative anxiety in pediatric  
57 patients. The VR with 360° video can deliver information via a consistent, vivid, and immersive experience to

58 pediatric patients without physical and financial limitations. High immersion and vividity are the main  
59 characteristics provided by VR technology, which can be utilized for the education of pediatric patient.

60

#### 61 **IV. Inclusion Criteria, Exclusion Criteria**

##### 62 **Inclusion:**

63 ASA I or II, aged 4–8 years, undergoing with chest radiography

##### 64 **Exclusion:**

65 History of prematurity or congenital disease

66 Hearing impairment

67 Cognitive deficits or cognitive and intellectual developmental disabilities

68 History of epilepsy or seizure taking psychoactive medications

69 History of epilepsy or seizure

70 Prior experience of chest radiography for the past 1 year

71

#### 72 **V. Targeted Number of Subjects and Calculation Basis**

73 Power analysis was performed using G\*Power 3.1.2 (Heinrich-Heine University, Düsseldorf,  
74 Germany). A previous study reported that the incidence of stress and anxiety during radiographic process was 53%  
75 for children based on the amended OSBD. A reduction of 50% of the incidence of stress and anxiety during  
76 radiographic process was considered to be clinically significant of the effect of the VR education. A sample size  
77 of 50 children per group was calculated with power of 0.8, significance level of 0.05, and 10% dropout rate.

78

#### 79 **VI. Recruitment of research subjects**

80 Only researchers participating in this research can explain about the study and acquire informed  
81 consent from pediatric patients and their caregivers who visited our department of radiology to perform chest X  
82 - ray. Written informed consent will be obtained from all parents/guardians of pediatric patients, and children  
83 aged 7 years or older sign additional agreements directly after receiving detailed instructions with their  
84 parents/guardians. He/she can refuse to participate in the study at any time during the experience of VR

85 experience education and the radiographing process after obtaining the consent. The researcher will explain  
86 using a general term that can be fully understood by the subject who is not a non-medical person and will give  
87 enough information about the contents of this research, and the benefits and disadvantages from the research.

88

## 89 **VII. Randomization**

90 The children are randomized to the control or VR group using a computer-generated randomization  
91 code (Random Allocation Software version 1.0; University of Medical Sciences, Isfahan, Iran), 10 min before  
92 the chest radiography. An opaque envelope containing sequential numbers is transferred to another researcher,  
93 and the intervention is performed in the separated area 5 min prior to entering the radiography room.

94

## 95 **VIII. Intervention**

96 For pediatric patients in the control group, the chest radiography is performed with usual simple  
97 instruction for chest radiography. Children in the VR group receive a 3 min VR education about radiologic  
98 process with a head- mounted VR display.

99

## 100 **IX. Virtual reality experience of the radiography room**

101 The VR experience is provided as a 360° 3-dimensional virtual environment that introduces and  
102 explains the process of chest radiography. The 3-min video was produced in collaboration with a VR producing  
103 company (JSC GAMES, Seoul, Korea). Chatan and Ace, famous animation characters of an animated film  
104 'Hello Carbot' (ChoiRock Contents Factory, Seoul, Korea), explains the process of chest radiography in detail ,  
105 encouraging the child to cooperate appropriately. Permission to use these animation characters have been  
106 obtained (licensing agreement with ChoiRock Contents Factory). In the VR video, pediatric patients experience  
107 the process of chest radiography with Chatan and Ace. They are asked to enter into a radiography room and  
108 have the opportunity to experience the radiography room. The child can learn how to posture in front of the  
109 radiology machine and to take a deep breath and to cooperate appropriately through the VR education. A head-  
110 mounted VR display, Oculus Go (Oculus VR, Menlo Park, CA, USA) will be used to play the VR video.

111

112 **X. Outcome measurement**

113 Children's stress and anxiety during the radiography process is measured with the amended version of  
114 Observational Scale of Behavioral Distress (OSBD) scale for X-ray procedures by a blinded single evaluator to  
115 exclude any possible interrater bias. Parental presence due to children's anxiety and parents/guardians'  
116 satisfaction score about the overall process of chest radiography using a numerical rating scale (11 NRS; 0, very  
117 dissatisfied; 10, very satisfied) will be recorded.

118 Time for radiography procedure (time from the entrance of radiography room to produce the chest  
119 radiographic image) and the number of re-take are recorded by the blinded single evaluator. After taking the  
120 chest radiography, the radiology technologist will score the level of difficulty of taking the chest radiography of  
121 each child using a NRS (11 NRS; 0, very difficult; 10, very easy).

122

123 **XI. Statistical analysis**

124 SPSS version 21.0 (SPSS Inc., IBM, Chicago, IL, USA) is utilized for all statistical analyses. The test  
125 of normal distribution is assessed using Shapiro-Wilk test. Continuous data (age, height, weight, OSBD score,  
126 parental satisfaction score, time for radiography procedure, process difficulty score) will be presented as the  
127 median (interquartile range [IQR]), and categorical variables (gender, reason for chest radiography, OSBD  
128 group, parental presence, number of re-take) be shown as numbers (%). Mann-Whitney U test is used for the  
129 analysis of continuous variables, and chi-square test or Fisher's exact test is used for categorical variables. A full  
130 analysis set is used for data analysis. All of the reported p-values are two-sided. A p value of less than 0.050 is  
131 considered to indicate statistical significance.

132 **XII. The benefits and risks**

133 In this study, it is considered that there is no additional risk or side effect due to the experience of less  
134 than 3 minute VR experience training conducted in this study. In case of VR education experience, it is expected  
135 that positive effects on patient cooperation, and the stress and anxiety during the procedure.

136

137 **XIII. Study stop or drop**

138 After the consent form is obtained, if the subject does not cooperate well or refuses to participate in the

139 experience of VR education, and if the subject and guardian want to stop participating in the study, the study  
140 will be stopped and the subject will be dropped out of the study.

141

#### 142 **XIV. Patients' Consent**

143 - Who will provide consent: Study subjects and caregivers

144 - To minimize the possibility of forcible or unjustified effects: Avoid unfair deception, unreasonable  
145 pressure or intimidation. Obtaining agreement only after confirming that the subject has an adequate  
146 understanding of the participation and the opportunity to take full account of the participation in the  
147 study.

148 - Language that can be understood by research subject or parents: Korean language without difficult  
149 Chinese characters or English.

150

#### 151 **XV. Payment for participation**

152 There is no financial benefit for the study subjects involved in clinical trials. However, small toys are provided  
153 to the pediatric patients participating in the study as a gift.

154

#### 155 **References**

156 1. Quan XB, Joseph A, Nanda U, Moyano-Smith O, Kanakri S, Ancheta C, et al. Improving  
157 Pediatric Radiography Patient Stress, Mood, and Parental Satisfaction Through Positive  
158 Environmental Distractions: A Randomized Control Trial. *J Pediatr Nurs.* 2016;31(1):E11-E22.

159 2. Alexander M. Managing patient stress in pediatric radiology. *Radiol Technol.*  
160 2012;83(6):549-60.

161 3. Smith TW, Kendall PC, Keefe FJ. Behavioral medicine and clinical health psychology:  
162 introduction to the special issue, a view from the decade of behavior. *J Consult Clin Psychol.*  
163 2002;70(3):459-62.

164 4. Porhomayon J, Kolesnikov S, Nader ND. The Impact of Stress Hormones on Post-traumatic  
165 Stress Disorders Symptoms and Memory in Cardiac Surgery Patients. *J Cardiovasc Thorac Res.*  
166 2014;6(2):79-84.

167 5. Sanborn PA, Michna E, Zurakowski D, Burrows PE, Fontaine PJ, Connor L, et al. Adverse  
168 cardiovascular and respiratory events during sedation of pediatric patients for imaging  
169 examinations. *Radiology.* 2005;237(1):288-94.

170 6. Arai YC, Ito H, Kandatsu N, Kurokawa S, Kinugasa S, Komatsu T. Parental presence during  
171 induction enhances the effect of oral midazolam on emergence behavior of children undergoing  
172 general anesthesia. *Acta Anaesthesiol Scand.* 2007;51(7):858-61.

173 7. Etzel-Hardman D, Kapsin K, Jones S, Churilla H. Sedation reduction in a pediatric  
174 radiology department. *J Healthc Qual.* 2009;31(4):34-9.

- 175 8. Rice M, Glasper A, Keeton D, Spargo P. The effect of a preoperative education programme  
176 on perioperative anxiety in children: an observational study. *Paediatr Anaesth.* 2008;18(5):426-30.
- 177 9. Ryu JH, Park SJ, Park JW, Kim JW, Yoo HJ, Kim TW, et al. Randomized clinical trial of  
178 immersive virtual reality tour of the operating theatre in children before anaesthesia. *Br J Surg.*  
179 2017;104(12):1628-33.
- 180 10. Bradford R. Short communication: the importance of psychosocial factors in  
181 understanding child distress during routine X-ray procedures. *J Child Psychol Psychiatry.*  
182 1990;31(6):973-82.
- 183

184 **Appendix A. Observational Scale of Behavioral Distress / Amended version for distress during**  
 185 **radiographic (x-ray) procedures**

| Behaviour                | Definition                                                                                             | Absent=0, Occasionally=1 or 2, Large extent=2 or 4                                        |
|--------------------------|--------------------------------------------------------------------------------------------------------|-------------------------------------------------------------------------------------------|
| <b>Crying</b>            | Tears in eyes or running down face                                                                     | 0 <input type="checkbox"/> 1 <input type="checkbox"/> 2 <input type="checkbox"/>          |
| <b>Cling</b>             | Physically holds on to parent or radiographer                                                          | 0 <input type="checkbox"/> 1 <input type="checkbox"/> 2 <input type="checkbox"/>          |
| <b>Fear verbal</b>       | Says 'I'm afraid' or 'I'm scared', etc.                                                                | 0 <input type="checkbox"/> 1 <input type="checkbox"/> 2 <input type="checkbox"/>          |
| <b>Pain verbal</b>       | Says 'Ow', 'Owch', etc.                                                                                | 0 <input type="checkbox"/> 1 <input type="checkbox"/> 2 <input type="checkbox"/>          |
| <b>Scream</b>            | No tears, raises voice                                                                                 | 0 <input type="checkbox"/> 2 <input type="checkbox"/> 4 <input type="checkbox"/>          |
| <b>Carry</b>             | Has to be carried into the room or put on table                                                        | 0 <input type="checkbox"/> 1 <input type="checkbox"/> 2 <input type="checkbox"/>          |
| <b>Flail</b>             | Random movement of limbs—intention to make aggressive contact                                          | 0 <input type="checkbox"/> 2 <input type="checkbox"/> 4 <input type="checkbox"/>          |
| <b>Refusal position</b>  | Does not follow instructions re. body placement on treatment table/in front of X-ray machine           | 0 <input type="checkbox"/> 1 <input type="checkbox"/> 2 <input type="checkbox"/>          |
| <b>Restrain</b>          | Has to be held down owing to lack of cooperation                                                       | 0 <input type="checkbox"/> 2 <input type="checkbox"/> 4 <input type="checkbox"/>          |
| <b>Muscular rigidity</b> | Any of the following: clenched fist, white knuckles, gritted teeth, eyes clenched shut, body stiffness | 0 <input type="checkbox"/> 2 <input type="checkbox"/> 4 <input type="checkbox"/>          |
| <b>Emotional support</b> | Seeks reassurance either verbally or nonverbally                                                       | 0 <input type="checkbox"/> 1 <input type="checkbox"/> 2 <input type="checkbox"/>          |
| <b>Total score :</b>     |                                                                                                        | <b>Not distressed</b> <input type="checkbox"/> <b>Distressed</b> <input type="checkbox"/> |

186

187 Weightings (a value of 2) were added to the behaviours restrain, scream, flail and muscular rigidity.

188

189 Distressed, a score of 4 or below

190 Not distressed, a score of 5 or above

191



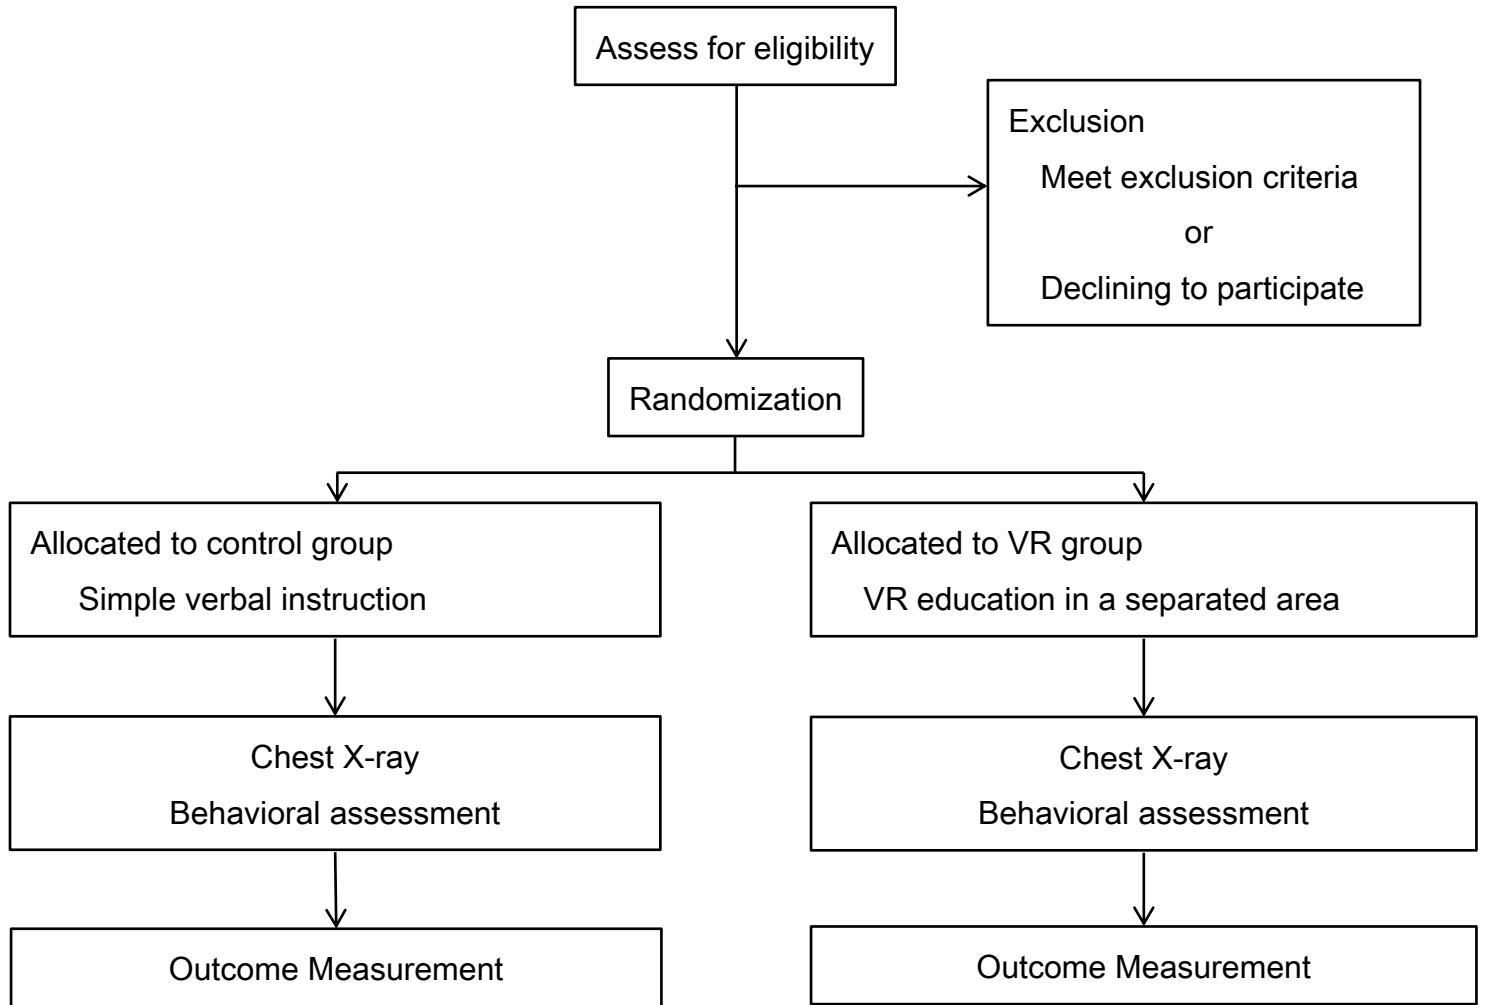

Supplement: jamapediatr-173-1026-s001.pdf [file jamapediatr-173-1026-s001.pdf]
