# Supplementary material
Source: PubMed Central journal article supplement (PMC6735421)
Supplement: jamapediatr-173-1026-s002.pdf [file jamapediatr-173-1026-s002.pdf]

## Data Sharing Statement

Han. Effect of Immersive Virtual Reality Education Before Chest Radiography on Anxiety and Distress Among Pediatric Patients. *JAMA Pediatr*. Published September 09, 2019.  
10.1001/jamapediatrics.2019.3000

### Data

**Data available:** Yes

**Data types:** Deidentified participant data

**How to access data:** The datasets generated and analyzed during the current study are available from the corresponding author ([jinaryu74@gmail.com](mailto:jinaryu74@gmail.com)) on reasonable request.

**When available:** With publication

### Supporting Documents

**Document types:** None

### Additional Information

**Who can access the data:** Researchers whose proposed use of the data has been approved

**Types of analyses:** for any purpose with reasonable request

**Mechanisms of data availability:** after approval of a proposal
